# Supplementary material for: Computational investigation of α-SiO2surfaces as a support for Pd
Source: Royal Society of Chemistry journal article supplement (doi:10.1039/d2cp04722e), 2023-01-01
Supplement: d2cp04722e1.pdf [file d2cp04722e1.pdf]

# Computational investigation of $\alpha$ -SiO<sub>2</sub> surfaces as a support for Pd

C.J. Lombard,<sup>a</sup> C.G.C.E. van Sittert,<sup>a\*</sup> J.N. Mugo,<sup>b</sup> C. Perry<sup>c</sup> and D.J. Willock<sup>d\*</sup>

<sup>a</sup> Laboratory for Applied Molecular Modelling, Research Focus Area: Chemical Resource Beneficiation, North-West University, Private Bag X6001, Potchefstroom, 252

<sup>b</sup> Johnson Matthey Technology Center, Belasis Avenue, Billingham TS23 1LH, United Kingdom

<sup>c</sup> Johnson Matthey Technology Center, Blount's Court, Sonning Common, Reading RG4 9NH, United Kingdom

<sup>d</sup> Max Planck–Cardiff Centre on the Fundamentals of Heterogeneous Catalysis FUNCAT· Cardiff Catalysis Institute, School of Chemistry, Cardiff University, Cardiff, CF10 3AT, United Kingdom

## Supplementary Information

### S1. Water reference structure molecular dynamics

The calculation of water adsorption energy and the surface energy of hydroxylated surfaces requires a reference state for the water molecule. In this work we compare results using a gas phase water reference and a liquid phase water reference.

For the liquid phase 64 molecules of water were placed in a cubic simulation box with a side length of 12.4 Å with the water molecules placed in a regular 4×4×4 array. This produces a system with the expected density of liquid water of 1.00 g cm<sup>-3</sup>. The periodic water model was first subjected to a high temperature (T=500 K) molecular dynamics (MD) simulation, using an NVE ensemble to maintain the density. For this phase of the calculation the TIP4P<sup>1,2</sup> potential in the DL-POLY<sup>3</sup> package was used with a 1 fs timestep. After 20 ps equilibration (velocity scaling) the simulation switched into the designated ensemble for a further 30 ps. This was sufficient to produce a randomised hydrogen bonded network model. The resulting structure was then used as input for a CASTEP MD simulation run using the NVT ensemble with a Nose-Hoover thermostat. The functional and basis set cut-off were the same as used for the SiO<sub>2</sub> slab calculations (PBE,  $E_{cut} = 700$  eV) and TS dispersion corrections were included. The MD calculations were carried out at the  $\Gamma$ -point (k sample (1×1×1)). This DFT MD was run at a simulation temperature of 300 K for a total run time of 3.5 ps.

Figure S1 shows the temperature and potential energy of the system as a function of time over the DFT MD calculation. It can be seen that after an initial sharp drop the calculated potential energy fluctuates around a constant value and the calculated temperature remains

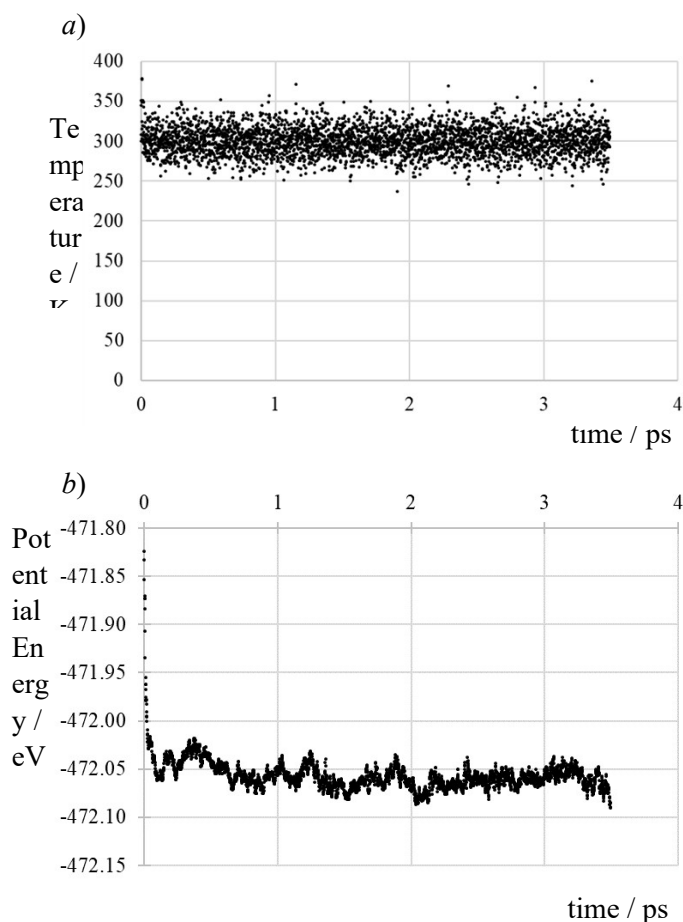

Figure S1. a) Temperature and b) potential energy as a function of time over the DFT molecular dynamics simulation for 64 water molecules at a density of  $1.00 \text{ g cm}^{-3}$ .

well within  $\pm 50 \text{ K}$  of the target temperature. To obtain the water reference energy 14 structures were taken at regular intervals from the trajectory of the simulation between 1 ps and 3.5 ps. Each structure was optimised using a fixed cell procedure and the same convergence criteria as used for simulation of the silica bulk and slab models. This gave liquid water reference energies of  $-472.0026 \pm 0.0074 \text{ eV}$  for the PBE functional alone and  $-472.1507 \pm 0.0052 \text{ eV}$  when dispersion is included. The error estimates here are the standard deviations calculated from the 14 optimised structure energies.

## References

- 1 W. L. Jorgensen, J. Chandrasekhar, J. D. Madura, R. W. Impey and M. L. Klein, Comparison of simple potential functions for simulating liquid water, *The Journal of Chemical Physics*, 1983, **79**, 926–935.
- 2 J. L. F. Abascal and C. Vega, A general purpose model for the condensed phases of water: TIP4P/2005, *The Journal of Chemical Physics*, 2005, **123**, 234505.

31. T. Todorov, W. Smith, K. Trachenko and M. T. Dove, DL\_POLY\_3: new dimensions in molecular dynamics simulations via massive parallelism, *J. Mater. Chem.*, 2006, **16**, 1911.
